# Supplementary material for: Phosphatidylcholine could protect the defect of zearalenone exposure on follicular development and oocyte maturation
Source: publisher site journal article supplement (doi:10.18632/aging.101660), 2018-11-25
Supplement: Supplementary file [file aging-v10i11-101660-supplementary-material-SD1.pdf]

## SUPPLEMENTARY FIGURES

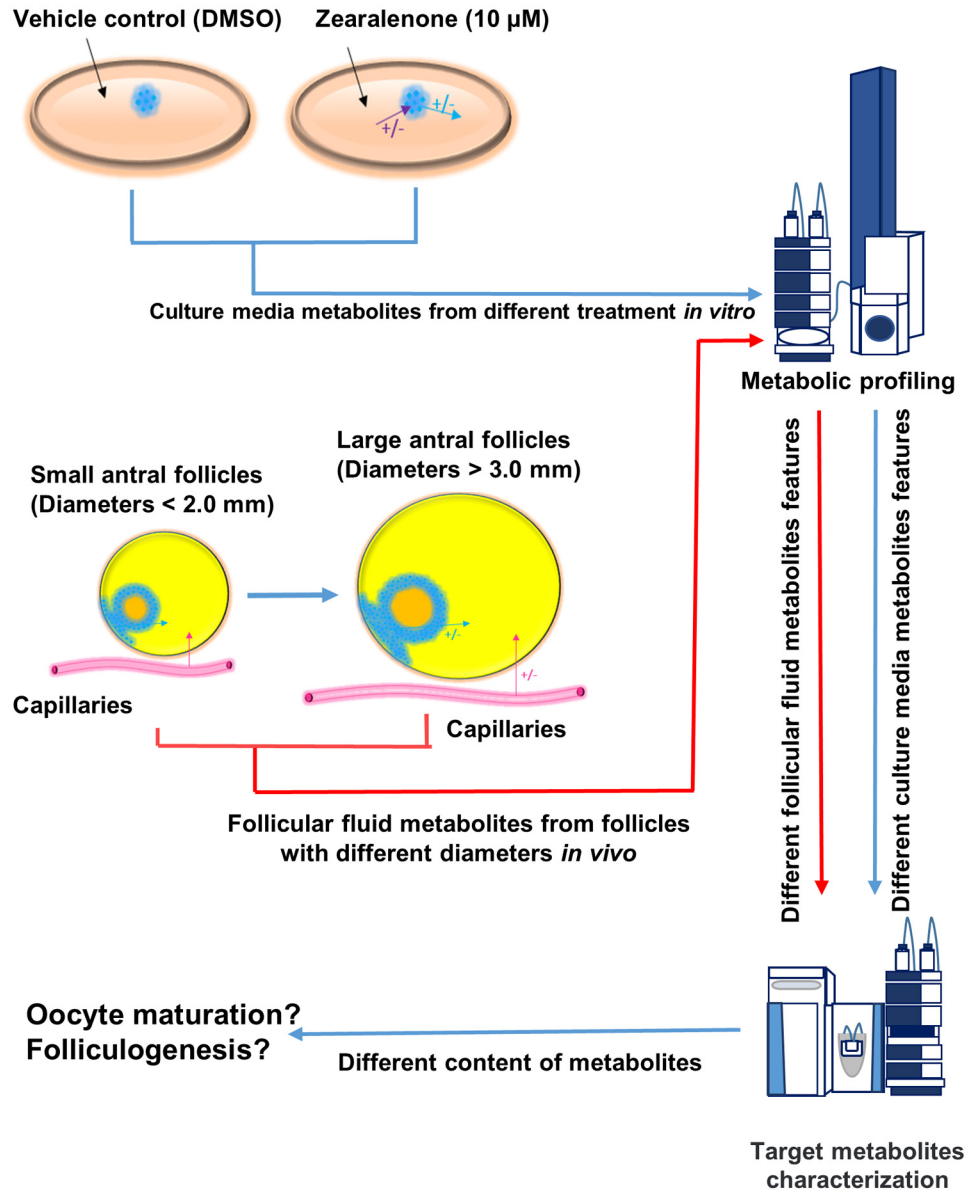

**Figure S1. Schematic diagram of the experimental design.** In order to compare the changes of metabolite profile composition, using the UPLC-QTOF methods, we detected the metabolomic profiles of small and large antral FF, and GC media with (+) or without (-) ZEA treatment. With regard to the targeted metabolic features, we used UPLC-MS/MS to perform structure qualitative analysis. Finally, target metabolites were exogenously added to verify whether they play a role on the effect of ZEA on oocyte or ovarian somatic cells.

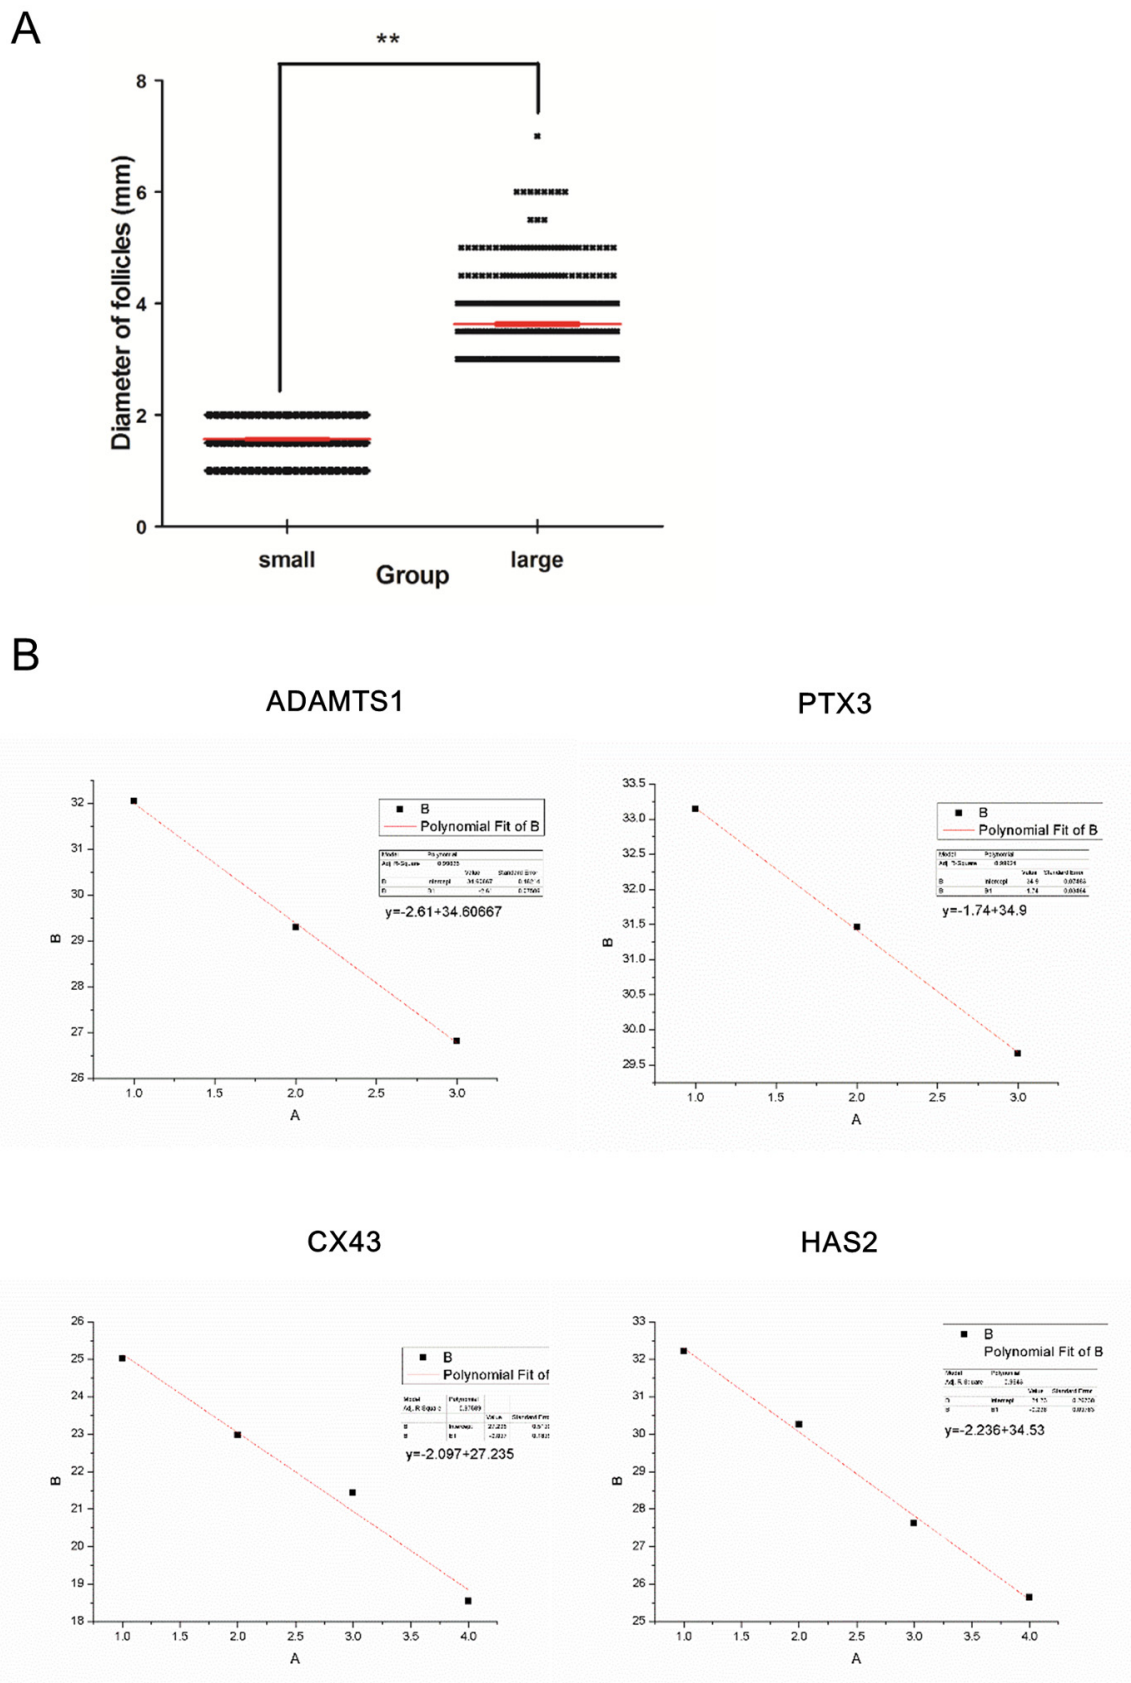

**Figure S2. The diameter of antral follicles and the amplification efficiency of each primer. (A)** The diameter of antral follicles used for FF metabolite profile detection. **(B)** The amplification efficiency of the primers of ADAMTS1, PTX3, CX43 and HAS2 genes.

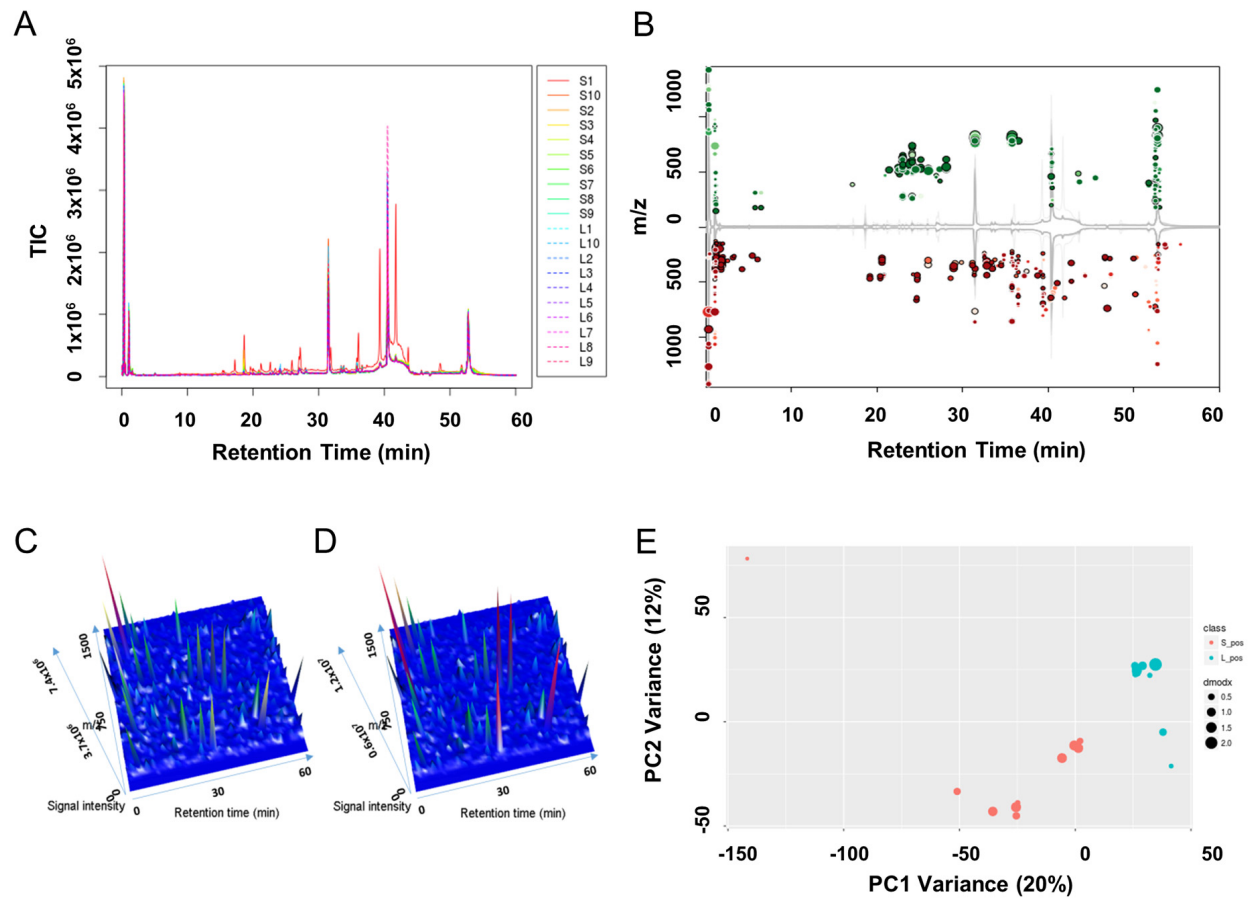

**Figure S3. Metabolic profiles of FF from small and large antral follicles.** Utilizing UPLC-QTOF detection, total ion current diagrams of the FF in small and large antral follicle are shown (A), with S1-S9 mean small antral follicle groups 1-9 and L1-L10 mean large antral follicle groups 1-9. Significantly different metabolites between small and large antral follicle isolated FF were marked in the cloud plot (B). Three-dimensional peak diagram of retention time, signal intensity, and m/z in small (C) and large (D) FF samples. PCA of the metabolic profiles among each sample between small (red point) and large (cyan point) FF (E).

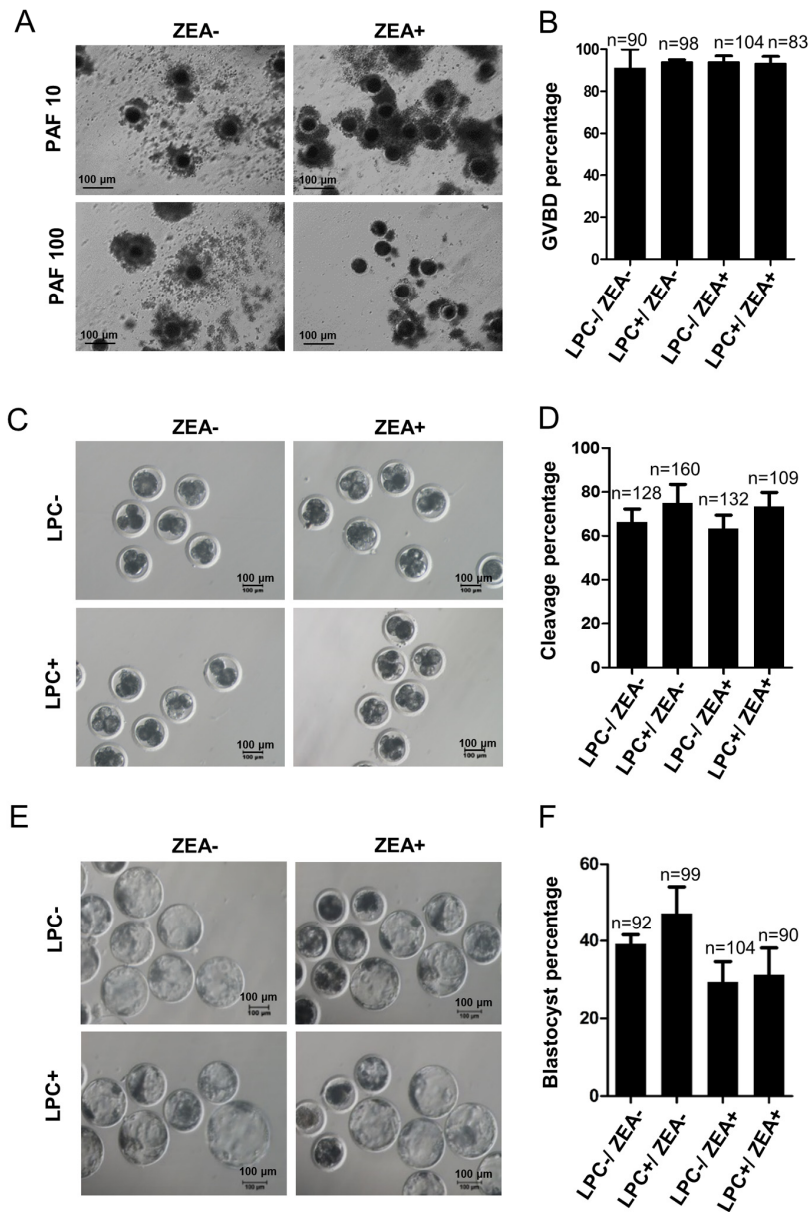

**Figure S4. Morphology of CC expansion and the effect of LPC co-treated ZEA on the development of parthenogenetic oocytes.** (A) Morphology of CC expansion status in 10  $\mu\text{g}/\text{mL}$  or 100  $\mu\text{g}/\text{mL}$  PAF and 10  $\mu\text{M}$  ZEA co-treated conditions. (B) The germinal vesicle breakdown (GVBD) percentage of oocytes in 10  $\mu\text{g}/\text{mL}$  LPC and 10  $\mu\text{M}$  ZEA co-treated condition. (C-D) The effect of supplementary 10  $\mu\text{g}/\text{mL}$  LPC and 10  $\mu\text{M}$  ZEA co-treated on cleavage of oocytes. (E-F) The effect of supplementary 10  $\mu\text{g}/\text{mL}$  LPC and 10  $\mu\text{M}$  ZEA on early parthenogenetic embryo development in vitro.

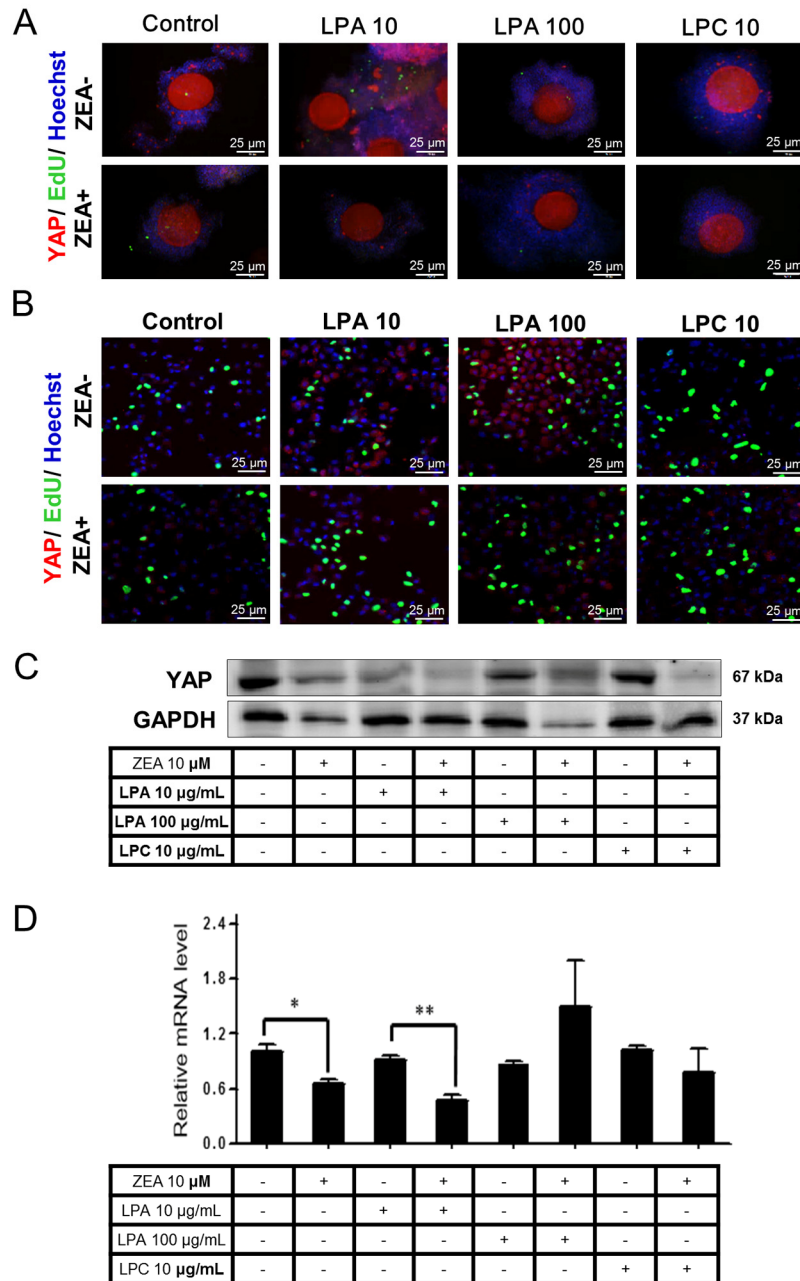

**Figure S5. The effect of LPC or lysophosphatidic acid (LPA) co-treat with ZEA on the localization and expression of yes associated protein (YAP) protein.** Immunofluorescence showed the cellular localization YAP and EdU in COCs (A) and GCs (B), which treated with 10  $\mu$ g/mL LPA, 100  $\mu$ g/mL LPA or 10  $\mu$ g/mL LPC, and with or without 10  $\mu$ M ZEA. Western blotting results showed the expression of YAP in GCs in LPC or LPA co-treated with ZEA (C and D).
