# Supplementary material for: Phosphatidylcholine could protect the defect of zearalenone exposure on follicular development and oocyte maturation
Source: publisher site journal article supplement (doi:10.18632/aging.101660), 2018-11-25
Supplement: Supplementary file [file aging-v10i11-101660-supplementary-material-SD5.pdf]

**Table S6. Top ten differential content metabolites in small and large follicle**

| Name          | Fold change | Log2  fold change | P-value  | Variation trend | Mass charge ratio (m/z) | retention time (min) | Mean value in small follicle | Standard error in small follicle | Mean value in large follicle | Standard error in large follicle |
|---------------|-------------|-------------------|----------|-----------------|-------------------------|----------------------|------------------------------|----------------------------------|------------------------------|----------------------------------|
| M522T2<br>5_1 | 3.600669546 | 1.848265201       | 9.66E-06 | UP              | 522.350481              | 25.11589167          | 32088.50063                  | 9688.98225                       | 115540.087                   | 32180.69213                      |
| M522T2<br>5_2 | 5.793439334 | 2.534420073       | 2.77E-05 | UP              | 524.366042              | 28.093375            | 33910.99475                  | 18526.1128                       | 196461.2909                  | 69676.63654                      |
| M522T2<br>5_3 | 5.160193029 | 2.367425034       | 3.65E-05 | UP              | 520.3347                | 22.97724167          | 18636.15416                  | 6262.90868                       | 96166.15281                  | 33549.90025                      |
| M522T2<br>5_4 | 3.51539851  | 1.813688244       | 6.12E-05 | UP              | 497.33868               | 24.11841667          | 30827.34188                  | 6759.33263                       | 108370.3917                  | 35772.02891                      |
| M522T2<br>5_5 | 3.788392626 | 1.921585858       | 7.81E-05 | UP              | 518.316795              | 24.11483333          | 60435.66775                  | 18031.9794                       | 228954.0381                  | 80768.47132                      |
| M522T2<br>5_6 | 3.682526516 | 1.880695913       | 0.000112 | UP              | 496.335073              | 24.11473333          | 113866.9282                  | 26199.4753                       | 419317.9824                  | 151498.9375                      |
| M227T1<br>1_1 | 1.158317089 | 0.212030245       | 0.000337 | UP              | 226.949528              | 1.047791667          | 377824.0983                  | 29068.6748                       | 437640.1097                  | 31441.56706                      |
| M339T4<br>0_3 | 1.487503772 | 0.572893327       | 0.001941 | UP              | 339.342307              | 40.385825            | 1379431.358                  | 387136.954                       | 2051909.348                  | 438944.8466                      |
| M393T4<br>4_2 | 1.635222266 | 0.709486746       | 0.004431 | UP              | 393.294307              | 44.15798333          | 127814.6378                  | 59286.6843                       | 209005.3416                  | 51858.20172                      |
| M393T4<br>4_3 | 1.427038356 | 0.513024112       | 0.004466 | UP              | 340.34526               | 40.38631667          | 148650.2877                  | 39179.6689                       | 212129.6621                  | 47404.31806                      |
| M393T4<br>4_4 | 1.640354698 | -0.714007806      | 0.00016  | DOWN            | 301.208494              | 35.77916667          | 204161.8368                  | 27086.5753                       | 124462.0063                  | 42824.96705                      |
| M772T0<br>4_4 | 179.5430016 | -7.488185609      | 0.000214 | DOWN            | 771.85274               | 0.310283333          | 61579.90948                  | 32644.3019                       | 98.13455975                  | 150.7219977                      |
| M772T0<br>4_5 | 1.454362588 | -0.540386993      | 0.000226 | DOWN            | 257.245006              | 35.77916667          | 262485.6022                  | 24887.0742                       | 180481.5418                  | 46209.27115                      |
| M431T0<br>1_1 | 1.059355783 | -0.083187198      | 0.002717 | DOWN            | 430.910954              | 0.310258333          | 1161421.493                  | 49125.9476                       | 1096346.96                   | 29277.52181                      |
| M273T4<br>8_1 | 2.89974533  | -1.535926201      | 0.003506 | DOWN            | 273.136469              | 48.3269              | 87125.25206                  | 46096.6134                       | 30045.82891                  | 4502.11648                       |
| M273T4<br>8_2 | 1.491972075 | -0.577220533      | 0.005749 | DOWN            | 685.430386              | 51.76326667          | 196747.4362                  | 57089.6285                       | 131870.723                   | 11585.79844                      |
| M273T4<br>8_3 | 1.393825167 | -0.47904961       | 0.006383 | DOWN            | 327.226572              | 33.40588333          | 195226.0875                  | 26964.8841                       | 140064.9752                  | 47507.28417                      |
| M227T0<br>1_1 | 1.074218539 | -0.103287525      | 0.006528 | DOWN            | 226.949762              | 0.310266667          | 2570916.072                  | 119819.316                       | 2393289.613                  | 137318.5994                      |
| M227T0<br>1_2 | 4.635915084 | -2.212854141      | 0.006774 | DOWN            | 226.950522              | 39.15915             | 49024.91782                  | 33941.0007                       | 10461.4041                   | 17460.6381                       |
| M273T4<br>7_1 | 2.360631848 | -1.239173064      | 0.012902 | DOWN            | 273.136098              | 47.19361667          | 111826.3169                  | 65058.5419                       | 47371.34976                  | 23233.81525                      |
