# Supplementary material for: Phosphatidylcholine could protect the defect of zearalenone exposure on follicular development and oocyte maturation
Source: publisher site journal article supplement (doi:10.18632/aging.101660), 2018-11-25
Supplement: Supplementary file [file aging-v10i11-101660-supplementary-material-SD6.pdf]

**Table S7. Prediction chemicals of the top ten differential content metabolites in small and large follicle**

| Mol_ID | Input mass | Adduct              | Mass    | D-ppm | Name                                        | Formula                                                         | CAS         | KEGG   | MS/MS | Link                        |
|--------|------------|---------------------|---------|-------|---------------------------------------------|-----------------------------------------------------------------|-------------|--------|-------|-----------------------------|
| 2081   | 284.137711 | [M+Na] <sup>+</sup> | 261.148 | 2     | 5-Hydroxy-6-desmethylprimaquine             | C <sub>14</sub> H <sub>19</sub> N <sub>3</sub> O <sub>2</sub>   | 87321-06-0  |        | NO    | metabo_info.php?molid=2081  |
| 40008  | 522.350481 | [M+H] <sup>+</sup>  | 521.348 | 9     | PC(O-16:1(11Z)/2:0)                         | C <sub>26</sub> H <sub>52</sub> N <sub>7</sub> O <sub>7</sub> P |             |        | NO    | metabo_info.php?molid=40008 |
| 40009  | 522.350481 | [M+H] <sup>+</sup>  | 521.348 | 9     | PC(O-16:1(9E)/2:0)[U]                       | C <sub>26</sub> H <sub>52</sub> N <sub>7</sub> O <sub>7</sub> P |             |        | NO    | metabo_info.php?molid=40009 |
| 40010  | 522.350481 | [M+H] <sup>+</sup>  | 521.348 | 9     | PC(O-16:1(9Z)/2:0)[U]                       | C <sub>26</sub> H <sub>52</sub> N <sub>7</sub> O <sub>7</sub> P |             |        | NO    | metabo_info.php?molid=40010 |
| 40174  | 522.350481 | [M+H] <sup>+</sup>  | 521.348 | 9     | PC(P-16:0/2:0)                              | C <sub>26</sub> H <sub>52</sub> N <sub>7</sub> O <sub>7</sub> P |             |        | NO    | metabo_info.php?molid=40174 |
| 40295  | 522.350481 | [M+H] <sup>+</sup>  | 521.348 | 9     | PC(18:1(6Z)/0:0)                            | C <sub>26</sub> H <sub>52</sub> N <sub>7</sub> O <sub>7</sub> P |             |        | NO    | metabo_info.php?molid=40295 |
| 40296  | 522.350481 | [M+H] <sup>+</sup>  | 521.348 | 9     | PC(18:1(9E)/0:0)                            | C <sub>26</sub> H <sub>52</sub> N <sub>7</sub> O <sub>7</sub> P |             |        | NO    | metabo_info.php?molid=40296 |
| 40297  | 522.350481 | [M+H] <sup>+</sup>  | 521.348 | 9     | PC(18:1(9)/0:0)[U]                          | C <sub>26</sub> H <sub>52</sub> N <sub>7</sub> O <sub>7</sub> P |             |        | NO    | metabo_info.php?molid=40297 |
| 40298  | 522.350481 | [M+H] <sup>+</sup>  | 521.348 | 9     | PC(18:1(9Z)/0:0)                            | C <sub>26</sub> H <sub>52</sub> N <sub>7</sub> O <sub>7</sub> P |             |        | NO    | metabo_info.php?molid=40298 |
| 40299  | 522.350481 | [M+H] <sup>+</sup>  | 521.348 | 9     | PC(18:1(9Z)/0:0)[U]                         | C <sub>26</sub> H <sub>52</sub> N <sub>7</sub> O <sub>7</sub> P |             | C03916 | NO    | metabo_info.php?molid=40299 |
| 40345  | 522.350481 | [M+H] <sup>+</sup>  | 521.348 | 9     | PC(0:0/18:1(6Z))                            | C <sub>26</sub> H <sub>52</sub> N <sub>7</sub> O <sub>7</sub> P |             |        | NO    | metabo_info.php?molid=40345 |
| 40346  | 522.350481 | [M+H] <sup>+</sup>  | 521.348 | 9     | PC(0:0/18:1(9E))                            | C <sub>26</sub> H <sub>52</sub> N <sub>7</sub> O <sub>7</sub> P |             |        | NO    | metabo_info.php?molid=40346 |
| 40347  | 522.350481 | [M+H] <sup>+</sup>  | 521.348 | 9     | PC(0:0/18:1(9E))[U]                         | C <sub>26</sub> H <sub>52</sub> N <sub>7</sub> O <sub>7</sub> P |             |        | NO    | metabo_info.php?molid=40347 |
| 40348  | 522.350481 | [M+H] <sup>+</sup>  | 521.348 | 9     | PC(0:0/18:1(9Z))                            | C <sub>26</sub> H <sub>52</sub> N <sub>7</sub> O <sub>7</sub> P |             |        | NO    | metabo_info.php?molid=40348 |
| 40349  | 522.350481 | [M+H] <sup>+</sup>  | 521.348 | 9     | PC(0:0/18:1(9Z))[U]                         | C <sub>26</sub> H <sub>52</sub> N <sub>7</sub> O <sub>7</sub> P |             |        | NO    | metabo_info.php?molid=40349 |
| 46689  | 522.350481 | [M+H] <sup>+</sup>  | 521.348 | 9     | PC(18:1(9E)/0:0)[U]                         | C <sub>26</sub> H <sub>52</sub> N <sub>7</sub> O <sub>7</sub> P |             |        | NO    | metabo_info.php?molid=46689 |
| 61695  | 522.350481 | [M+H] <sup>+</sup>  | 521.348 | 9     | LysoPC(18:1(11Z))                           | C <sub>26</sub> H <sub>52</sub> N <sub>7</sub> O <sub>7</sub> P |             | C04230 | NO    | metabo_info.php?molid=61695 |
| 1E+05  | 522.350481 | [M+H] <sup>+</sup>  | 521.348 | 9     | PC(18:1(9Z)/0:0)[rac]                       | C <sub>26</sub> H <sub>52</sub> N <sub>7</sub> O <sub>7</sub> P |             |        | NO    | metabo_info.php?molid=10270 |
| 184    | 522.350481 | [M+H] <sup>+</sup>  | 521.348 | 9     | PC(18:1(9Z)/0:0)[U] / PC(18:1(9Z)/0:0)[rac] | C <sub>26</sub> H <sub>52</sub> N <sub>7</sub> O <sub>7</sub> P | 3542-29-8   |        | NO    | metabo_info.php?molid=184   |
| 43413  | 524.366042 | [M+H] <sup>+</sup>  | 523.364 | 9     | enantio-PAF C-16                            | C <sub>26</sub> H <sub>54</sub> N <sub>7</sub> O <sub>7</sub> P | 117985-57-6 |        | YES   | metabo_info.php?molid=43413 |
| 34488  | 524.366042 | [M+H] <sup>+</sup>  | 523.364 | 9     | PAF C-16                                    | C <sub>26</sub> H <sub>54</sub> N <sub>7</sub> O <sub>7</sub> P | 74389-68-7  |        | YES   | metabo_info.php?molid=34488 |
| 40161  | 524.366042 | [M+H] <sup>+</sup>  | 523.364 | 9     | PC(2:0/O-16:0)[U]                           | C <sub>26</sub> H <sub>54</sub> N <sub>7</sub> O <sub>7</sub> P |             |        | NO    | metabo_info.php?molid=40161 |
| 40075  | 524.366042 | [M+H] <sup>+</sup>  | 523.364 | 9     | PC(O-16:0/2:0)                              | C <sub>26</sub> H <sub>54</sub> N <sub>7</sub> O <sub>7</sub> P |             |        | NO    | metabo_info.php?molid=40075 |
| 40076  | 524.366042 | [M+H] <sup>+</sup>  | 523.364 | 9     | PC(O-16:0/2:0)[S]                           | C <sub>26</sub> H <sub>54</sub> N <sub>7</sub> O <sub>7</sub> P |             |        | NO    | metabo_info.php?molid=40076 |

|       |            |                     |         |   |                                        |            |                |            |                             |                           |
|-------|------------|---------------------|---------|---|----------------------------------------|------------|----------------|------------|-----------------------------|---------------------------|
| 40077 | 524.366042 | [M+H] <sup>+</sup>  | 523.364 | 9 | PC(O-16:0/2:0)[U]                      | C26H54NO7P |                | NO         | metabo_info.php?molid=40077 |                           |
| 40292 | 524.366042 | [M+H] <sup>+</sup>  | 523.364 | 9 | PC(18:0/0:0)                           | C26H54NO7P |                | NO         | metabo_info.php?molid=40292 |                           |
| 40293 | 524.366042 | [M+H] <sup>+</sup>  | 523.364 | 9 | PC(18:0/0:0)[S]                        | C26H54NO7P |                | NO         | metabo_info.php?molid=40293 |                           |
| 40294 | 524.366042 | [M+H] <sup>+</sup>  | 523.364 | 9 | PC(18:0/0:0)[U]                        | C26H54NO7P |                | NO         | metabo_info.php?molid=40294 |                           |
| 40342 | 524.366042 | [M+H] <sup>+</sup>  | 523.364 | 9 | PC(0:0/18:0)                           | C26H54NO7P |                | NO         | metabo_info.php?molid=40342 |                           |
| 40343 | 524.366042 | [M+H] <sup>+</sup>  | 523.364 | 9 | PC(0:0/18:0)[S]                        | C26H54NO7P |                | NO         | metabo_info.php?molid=40343 |                           |
| 40344 | 524.366042 | [M+H] <sup>+</sup>  | 523.364 | 9 | PC(0:0/18:0)[U]                        | C26H54NO7P |                | NO         | metabo_info.php?molid=40344 |                           |
| 61694 | 524.366042 | [M+H] <sup>+</sup>  | 523.364 | 9 | LysoPC(18:0)                           | C26H54NO7P | C042<br>30     | NO         | metabo_info.php?molid=61694 |                           |
| 61991 | 524.366042 | [M+H] <sup>+</sup>  | 523.364 | 9 | LysoPC(0:0/18:0)                       | C26H54NO7P |                | NO         | metabo_info.php?molid=61991 |                           |
| 77692 | 524.366042 | [M+H] <sup>+</sup>  | 523.364 | 9 | PE(21:0/0:0)<br>i-                     | C26H54NO7P |                | NO         | metabo_info.php?molid=77692 |                           |
| 1     | 520.3347   | [M+H] <sup>+</sup>  | 519.332 | 9 | Linoleoylglycerophosphochol<br>i-      | C26H50NO7P | 15895-<br>41-7 | C041<br>00 | NO                          | metabo_info.php?molid=1   |
| 40300 | 520.3347   | [M+H] <sup>+</sup>  | 519.332 | 9 | PC(18:2(2E,4E)/0:0)                    | C26H50NO7P |                | NO         | metabo_info.php?molid=40300 |                           |
| 40301 | 520.3347   | [M+H] <sup>+</sup>  | 519.332 | 9 | PC(18:2(9Z,12Z)/0:0)                   | C26H50NO7P |                | NO         | metabo_info.php?molid=40301 |                           |
| 40302 | 520.3347   | [M+H] <sup>+</sup>  | 519.332 | 9 | PC(18:2(9Z,12Z)/0:0)[U]                | C26H50NO7P |                | NO         | metabo_info.php?molid=40302 |                           |
| 61696 | 520.3347   | [M+H] <sup>+</sup>  | 519.332 | 9 | LysoPC(18:2(9Z,12Z))                   | C26H50NO7P | C042<br>30     | NO         | metabo_info.php?molid=61696 |                           |
| 86851 | 497.33868  | [M+Na] <sup>+</sup> | 474.346 | 7 | Dehydrocarpaine II                     | C28H46N2O4 | 72362-<br>03-9 | NO         | metabo_info.php?molid=86851 |                           |
| 182   | 518.316795 | [M+Na] <sup>+</sup> | 495.332 | 9 | PC(16:0/0:0)[U] /<br>PC(16:0/0:0)[rac] | C24H50NO7P | 17364-<br>16-8 | C041<br>02 | YES                         | metabo_info.php?molid=182 |
| 40048 | 518.316795 | [M+Na] <sup>+</sup> | 495.332 | 9 | PC(O-14:0/2:0)                         | C24H50NO7P |                | NO         | metabo_info.php?molid=40048 |                           |
| 40049 | 518.316795 | [M+Na] <sup>+</sup> | 495.332 | 9 | PC(O-14:0/2:0)[U]                      | C24H50NO7P |                | NO         | metabo_info.php?molid=40049 |                           |
| 40284 | 518.316795 | [M+Na] <sup>+</sup> | 495.332 | 9 | PC(16:0/0:0)                           | C24H50NO7P |                | NO         | metabo_info.php?molid=40284 |                           |
| 40285 | 518.316795 | [M+Na] <sup>+</sup> | 495.332 | 9 | PC(16:0/0:0)[S]                        | C24H50NO7P |                | NO         | metabo_info.php?molid=40285 |                           |
| 40286 | 518.316795 | [M+Na] <sup>+</sup> | 495.332 | 9 | PC(16:0/0:0)[U]                        | C24H50NO7P |                | NO         | metabo_info.php?molid=40286 |                           |
| 40340 | 518.316795 | [M+Na] <sup>+</sup> | 495.332 | 9 | PC(0:0/16:0)                           | C24H50NO7P |                | NO         | metabo_info.php?molid=40340 |                           |
| 40341 | 518.316795 | [M+Na] <sup>+</sup> | 495.332 | 9 | PC(0:0/16:0)[U]                        | C24H50NO7P |                | NO         | metabo_info.php?molid=40341 |                           |
| 61692 | 518.316795 | [M+Na] <sup>+</sup> | 495.332 | 9 | LysoPC(16:0)                           | C24H50NO7P | C042<br>30     | NO         | metabo_info.php?molid=61692 |                           |
| 77694 | 518.316795 | [M+Na] <sup>+</sup> | 495.332 | 9 | PE(19:0/0:0)                           | C24H50NO7P |                | NO         | metabo_info.php?molid=77694 |                           |
| 1E+05 | 518.316795 | [M+Na] <sup>+</sup> | 495.332 | 9 | PC(16:0/0:0)[rac]                      | C24H50NO7P |                | NO         | metabo_info.php?molid=10270 |                           |

|       |            |                     |         |   |                                              |            |                 |            |     |                             |
|-------|------------|---------------------|---------|---|----------------------------------------------|------------|-----------------|------------|-----|-----------------------------|
| 182   | 496.335073 | [M+H] <sup>+</sup>  | 495.332 | 9 | PC(16:0/0:0)[U] /<br>PC(16:0/0:0)[rac]       | C24H50NO7P | 17364-<br>16-8  | C041<br>02 | YES | metabo_info.php?molid=182   |
| 40048 | 496.335073 | [M+H] <sup>+</sup>  | 495.332 | 9 | PC(O-14:0/2:0)                               | C24H50NO7P |                 |            | NO  | metabo_info.php?molid=40048 |
| 40049 | 496.335073 | [M+H] <sup>+</sup>  | 495.332 | 9 | PC(O-14:0/2:0)[U]                            | C24H50NO7P |                 |            | NO  | metabo_info.php?molid=40049 |
| 40284 | 496.335073 | [M+H] <sup>+</sup>  | 495.332 | 9 | PC(16:0/0:0)                                 | C24H50NO7P |                 |            | NO  | metabo_info.php?molid=40284 |
| 40285 | 496.335073 | [M+H] <sup>+</sup>  | 495.332 | 9 | PC(16:0/0:0)[S]                              | C24H50NO7P |                 |            | NO  | metabo_info.php?molid=40285 |
| 40286 | 496.335073 | [M+H] <sup>+</sup>  | 495.332 | 9 | PC(16:0/0:0)[U]                              | C24H50NO7P |                 |            | NO  | metabo_info.php?molid=40286 |
| 40340 | 496.335073 | [M+H] <sup>+</sup>  | 495.332 | 9 | PA                                           | C24H50NO7P |                 |            | NO  | metabo_info.php?molid=40340 |
| 40341 | 496.335073 | [M+H] <sup>+</sup>  | 495.332 | 9 | PC(0:0/16:0)[U]                              | C24H50NO7P |                 |            | NO  | metabo_info.php?molid=40341 |
| 61692 | 496.335073 | [M+H] <sup>+</sup>  | 495.332 | 9 | LysoPC(16:0)                                 | C24H50NO7P |                 | C042<br>30 | NO  | metabo_info.php?molid=61692 |
| 77694 | 496.335073 | [M+H] <sup>+</sup>  | 495.332 | 9 | PE(19:0/0:0)                                 | C24H50NO7P |                 |            | NO  | metabo_info.php?molid=77694 |
| 1E+05 | 496.335073 | [M+H] <sup>+</sup>  | 495.332 | 9 | PC(16:0/0:0)[rac]                            | C24H50NO7P |                 |            | NO  | metabo_info.php?molid=10270 |
| 58392 | 496.335073 | [M+Na] <sup>+</sup> | 473.351 | 9 | Docosa-4,7,10,13,16-<br>pentaenoyl carnitine | C29H47NO4  |                 |            | NO  | metabo_info.php?molid=58392 |
| 58428 | 496.335073 | [M+Na] <sup>+</sup> | 473.351 | 9 | Clupanodonyl carnitine                       | C29H47NO4  |                 |            | NO  | metabo_info.php?molid=58428 |
| 87655 | 496.335073 | [M+Na] <sup>+</sup> | 473.351 | 9 | 23-Acetoxyoladulcidine                       | C29H47NO4  | 152128<br>-85-3 |            | NO  | metabo_info.php?molid=87655 |
| 24084 | 257.245006 | [M+H] <sup>+</sup>  | 256.24  | 9 | 2-Hexyldecanoic acid                         | C16H32O2   | 25354-<br>97-6  |            | YES | metabo_info.php?molid=24084 |
| 34669 | 257.245006 | [M+H] <sup>+</sup>  | 256.24  | 9 | 4,8,12-trimethyl-tridecanoic<br>acid         | C16H32O2   |                 |            | NO  | metabo_info.php?molid=34669 |
| 4289  | 257.245006 | [M+H] <sup>+</sup>  | 256.24  | 9 | Isopalmitic acid                             | C16H32O2   | #####           |            | YES | metabo_info.php?molid=4289  |
| 4320  | 257.245006 | [M+H] <sup>+</sup>  | 256.24  | 9 | 2,0-dimethyl-tridecanoic<br>acid             | C16H32O2   |                 |            | NO  | metabo_info.php?molid=4320  |
| 4321  | 257.245006 | [M+H] <sup>+</sup>  | 256.24  | 9 | 2,0-dimethyl-tridecanoic<br>acid             | C16H32O2   |                 |            | NO  | metabo_info.php?molid=4321  |
| 45004 | 257.245006 | [M+H] <sup>+</sup>  | 256.24  | 9 | Myristic Acid ethyl ester                    | C16H32O2   | 124-<br>06-1    |            | YES | metabo_info.php?molid=45004 |
| 187   | 257.245006 | [M+H] <sup>+</sup>  | 256.24  | 9 | Palmitic acid                                | C16H32O2   | #####           | C002<br>49 | YES | metabo_info.php?molid=187   |
| 45768 | 257.245006 | [M+H] <sup>+</sup>  | 256.24  | 9 | 13,13-dimethyl-<br>tetradecanoic acid        | C16H32O2   |                 |            | NO  | metabo_info.php?molid=45768 |
| 46330 | 257.245006 | [M+H] <sup>+</sup>  | 256.24  | 9 | Tetradecyl acetate                           | C16H32O2   |                 |            | NO  | metabo_info.php?molid=46330 |
| 73615 | 257.245006 | [M+H] <sup>+</sup>  | 256.24  | 9 | 3-methyl-pentadecanoic acid                  | C16H32O2   |                 |            | NO  | metabo_info.php?molid=73615 |
| 73616 | 257.245006 | [M+H] <sup>+</sup>  | 256.24  | 9 | 2-propyl-tridecanoic acid                    | C16H32O2   |                 |            | NO  | metabo_info.php?molid=73616 |

|       |            |                    |         |   |                                                                       |              |                 |    |                             |
|-------|------------|--------------------|---------|---|-----------------------------------------------------------------------|--------------|-----------------|----|-----------------------------|
| 73617 | 257.245006 | [M+H] <sup>+</sup> | 256.24  | 9 | 2-hexyl-decanoic acid                                                 | C16H32O2     |                 | NO | metabo_info.php?molid=73617 |
| 73618 | 257.245006 | [M+H] <sup>+</sup> | 256.24  | 9 | 3-ethyl-3-methyl-tridecanoic acid                                     | C16H32O2     |                 | NO | metabo_info.php?molid=73618 |
| 73619 | 257.245006 | [M+H] <sup>+</sup> | 256.24  | 9 | 2-heptyl-nonanoic acid                                                | C16H32O2     |                 | NO | metabo_info.php?molid=73619 |
| 73620 | 257.245006 | [M+H] <sup>+</sup> | 256.24  | 9 | 6-ethyl-tetradecanoic acid                                            | C16H32O2     |                 | NO | metabo_info.php?molid=73620 |
| 73621 | 257.245006 | [M+H] <sup>+</sup> | 256.24  | 9 | 2,4-dimethyl-tetradecanoic acid                                       | C16H32O2     |                 | NO | metabo_info.php?molid=73621 |
| 73622 | 257.245006 | [M+H] <sup>+</sup> | 256.24  | 9 | 3,5-dimethyl-tetradecanoic acid                                       | C16H32O2     |                 | NO | metabo_info.php?molid=73622 |
| 73623 | 257.245006 | [M+H] <sup>+</sup> | 256.24  | 9 | 4-hexyl-decanoic acid                                                 | C16H32O2     |                 | NO | metabo_info.php?molid=73623 |
| 73624 | 257.245006 | [M+H] <sup>+</sup> | 256.24  | 9 | 2-ethyl-2-butyl-decanoic acid                                         | C16H32O2     |                 | NO | metabo_info.php?molid=73624 |
| 73638 | 257.245006 | [M+H] <sup>+</sup> | 256.24  | 9 | 1,3-dimethyl-pentadecanoic acid                                       | C16H32O2     |                 | NO | metabo_info.php?molid=73638 |
| 73688 | 257.245006 | [M+H] <sup>+</sup> | 256.24  | 9 | Tridecanoic acid, 4,8,12-trimethyl-; 4,8,12-Trimethyltridecanoic acid | C16H32O2     |                 | NO | metabo_info.php?molid=73688 |
| 73765 | 257.245006 | [M+H] <sup>+</sup> | 256.24  | 9 | 14:0(10Me,13Me)                                                       | C16H32O2     |                 | NO | metabo_info.php?molid=73765 |
| 75391 | 257.245006 | [M+H] <sup>+</sup> | 256.24  | 9 | 2-hydroxyhexadecanal                                                  | C16H32O2     |                 | NO | metabo_info.php?molid=75391 |
| 88155 | 257.245006 | [M+H] <sup>+</sup> | 256.24  | 9 | Butyl dodecanoate                                                     | C16H32O2     | 106-18-3        | NO | metabo_info.php?molid=88155 |
| 88297 | 257.245006 | [M+H] <sup>+</sup> | 256.24  | 9 | Dodecyl butyrate                                                      | C16H32O2     | 3724-61-6       | NO | metabo_info.php?molid=88297 |
| 88363 | 257.245006 | [M+H] <sup>+</sup> | 256.24  | 9 | Hexyl decanoate                                                       | C16H32O2     | 10448-26-7      | NO | metabo_info.php?molid=88363 |
| 89043 | 257.245006 | [M+H] <sup>+</sup> | 256.24  | 9 | Octyl octanoate                                                       | C16H32O2     | 2306-88-9       | NO | metabo_info.php?molid=89043 |
| 91358 | 257.245006 | [M+H] <sup>+</sup> | 256.24  | 9 | Dodecyl 2-methylpropanoate                                            | C16H32O2     | 6624-71-1       | NO | metabo_info.php?molid=91358 |
| 97177 | 257.245006 | [M+H] <sup>+</sup> | 256.24  | 9 | decyl hexanoate                                                       | C16H32O2     |                 | NO | metabo_info.php?molid=97177 |
| 97207 | 257.245006 | [M+H] <sup>+</sup> | 256.24  | 9 | formyl 2,6,10-trimethyl-dodecanoate                                   | C16H32O2     |                 | NO | metabo_info.php?molid=97207 |
| 97294 | 257.245006 | [M+H] <sup>+</sup> | 256.24  | 9 | 7-Methyloctyl 5-methylhexanoate                                       | C16H32O2     |                 | NO | metabo_info.php?molid=97294 |
| 69492 | 226.949528 | [M+H] <sup>+</sup> | 225.944 | 5 | 2,5-Dichloro-4-oxohex-2-enedioate                                     | C6H4Cl2O5    | C12835          | NO | metabo_info.php?molid=69492 |
| 66759 | 273.136469 | [M+H] <sup>+</sup> | 272.129 | 0 | Procaine hydrochloride                                                | C13H21ClN2O2 | #####<br>C07894 | NO | metabo_info.php?molid=66759 |

|       |            |                     |         |   |                                                                   |            |             |        |     |                             |
|-------|------------|---------------------|---------|---|-------------------------------------------------------------------|------------|-------------|--------|-----|-----------------------------|
| 67546 | 273.136469 | [M+H] <sup>+</sup>  | 272.131 | 7 | Sempervirine                                                      | C19H16N2   | 6882-99-1   | C09240 | NO  | metabo_info.php?molid=67546 |
| 1271  | 273.136469 | [M+Na] <sup>+</sup> | 250.147 | 0 | Desmethylmianserin                                                | C17H18N2   | 71936-92-0  |        | NO  | metabo_info.php?molid=1271  |
| 35989 | 393.294307 | [M+Na] <sup>+</sup> | 370.308 | 8 | Docosanedioic acid                                                | C22H42O4   |             | C19625 | NO  | metabo_info.php?molid=35989 |
| 69902 | 393.294307 | [M+Na] <sup>+</sup> | 370.308 | 8 | Di(2-ethylhexyl) adipate                                          | C22H42O4   | 103-23-1    | C14240 | NO  | metabo_info.php?molid=69902 |
| 95990 | 393.294307 | [M+Na] <sup>+</sup> | 370.308 | 8 | Diocetyl hexanedioate                                             | C22H42O4   | 123-79-5    |        | NO  | metabo_info.php?molid=95990 |
| 93069 | 685.430386 | [M+Na] <sup>+</sup> | 662.439 | 2 | Goyaglycoside c                                                   | C38H62O9   | 333332-49-3 |        | NO  | metabo_info.php?molid=93069 |
| 64806 | 685.430386 | [M+Na] <sup>+</sup> | 662.441 | 0 | 3-hexanoyl-NBD Cholesterol                                        | C39H58N4O5 | NA          |        | YES | metabo_info.php?molid=64806 |
| 72401 | 327.226572 | [M+Na] <sup>+</sup> | 304.238 | 1 | Sodium oleate                                                     | C18H33NaO2 | 143-19-1    | C18601 | NO  | metabo_info.php?molid=72401 |
| 24087 | 327.226572 | [M+Na] <sup>+</sup> | 304.24  | 8 | 8,11-eicosadiynoic acid                                           | C20H32O2   | 82073-91-4  |        | YES | metabo_info.php?molid=24087 |
| 44955 | 327.226572 | [M+Na] <sup>+</sup> | 304.24  | 8 | Stearidonic Acid ethyl ester                                      | C20H32O2   | 119798-44-6 |        | YES | metabo_info.php?molid=44955 |
| 34842 | 327.226572 | [M+Na] <sup>+</sup> | 304.24  | 8 | 4,8,12,16-eicosatetraenoic acid                                   | C20H32O2   |             |        | NO  | metabo_info.php?molid=34842 |
| 34843 | 327.226572 | [M+Na] <sup>+</sup> | 304.24  | 8 | 6,10,14,18-eicosatetraenoic acid                                  | C20H32O2   |             |        | NO  | metabo_info.php?molid=34843 |
| 34844 | 327.226572 | [M+Na] <sup>+</sup> | 304.24  | 8 | 8,11,14,17-eicosatetraenoic acid                                  | C20H32O2   |             |        | NO  | metabo_info.php?molid=34844 |
| 35052 | 327.226572 | [M+Na] <sup>+</sup> | 304.24  | 8 | 4,7,10,13-eicosatetraenoic acid                                   | C20H32O2   |             |        | NO  | metabo_info.php?molid=35052 |
| 35053 | 327.226572 | [M+Na] <sup>+</sup> | 304.24  | 8 | 4Z,7Z,10Z,13Z-eicosatetraenoic acid                               | C20H32O2   |             |        | NO  | metabo_info.php?molid=35053 |
| 35054 | 327.226572 | [M+Na] <sup>+</sup> | 304.24  | 8 | 4Z,8Z,11Z,14Z-eicosatetraenoic acid                               | C20H32O2   |             |        | NO  | metabo_info.php?molid=35054 |
| 35055 | 327.226572 | [M+Na] <sup>+</sup> | 304.24  | 8 | 5,11,14,17-Eicosatetraenoic acid                                  | C20H32O2   |             |        | NO  | metabo_info.php?molid=35055 |
| 35056 | 327.226572 | [M+Na] <sup>+</sup> | 304.24  | 8 | 3,6,11,14-Eicosatetraenoic acid / 5,8,11,14-eicosatetraenoic acid | C20H32O2   |             |        | NO  | metabo_info.php?molid=35056 |



|       |            |                     |        |   |                                                      |          |            |        |     |                             |
|-------|------------|---------------------|--------|---|------------------------------------------------------|----------|------------|--------|-----|-----------------------------|
| 35057 | 327.226572 | [M+Na] <sup>+</sup> | 304.24 | 8 | 5Z,11Z,14Z,17Z-eicosatetraenoic acid                 | C20H32O2 |            |        | NO  | metabo_info.php?molid=35057 |
| 35058 | 327.226572 | [M+Na] <sup>+</sup> | 304.24 | 8 | 8Z,11Z,14Z,18Z-eicosatetraenoic acid                 | C20H32O2 |            |        | NO  | metabo_info.php?molid=35058 |
| 41846 | 327.226572 | [M+Na] <sup>+</sup> | 304.24 | 8 | Mestanolone                                          | C20H32O2 |            |        | NO  | metabo_info.php?molid=41846 |
| 193   | 327.226572 | [M+Na] <sup>+</sup> | 304.24 | 8 | Arachidonic Acid (peroxide free)                     | C20H32O2 | 506-32-1   | C00219 | YES | metabo_info.php?molid=193   |
| 41259 | 327.226572 | [M+Na] <sup>+</sup> | 304.24 | 8 | Taxa-4(20),11(12)-dien-5&alpha;,13&alpha;-diol       | C20H32O2 |            | C11897 | NO  | metabo_info.php?molid=41259 |
| 41839 | 327.226572 | [M+Na] <sup>+</sup> | 304.24 | 8 | Methandriol                                          | C20H32O2 |            | C14493 | NO  | metabo_info.php?molid=41839 |
| 53642 | 327.226572 | [M+Na] <sup>+</sup> | 304.24 | 8 | (+)-Serradiol                                        | C20H32O2 |            |        | NO  | metabo_info.php?molid=53642 |
| 53661 | 327.226572 | [M+Na] <sup>+</sup> | 304.24 | 8 | (-)-Cladielline                                      | C20H32O2 |            |        | NO  | metabo_info.php?molid=53661 |
| 53671 | 327.226572 | [M+Na] <sup>+</sup> | 304.24 | 8 | (-)-Amijiol                                          | C20H32O2 |            |        | NO  | metabo_info.php?molid=53671 |
| 53672 | 327.226572 | [M+Na] <sup>+</sup> | 304.24 | 8 | (-)-Isoamijiol                                       | C20H32O2 |            |        | NO  | metabo_info.php?molid=53672 |
| 53699 | 327.226572 | [M+Na] <sup>+</sup> | 304.24 | 8 | Isotrinervidiol                                      | C20H32O2 |            |        | NO  | metabo_info.php?molid=53699 |
| 53713 | 327.226572 | [M+Na] <sup>+</sup> | 304.24 | 8 | Acutilol A                                           | C20H32O2 |            | C09057 | NO  | metabo_info.php?molid=53713 |
| 53723 | 327.226572 | [M+Na] <sup>+</sup> | 304.24 | 8 | (-)-Reiswigin A                                      | C20H32O2 |            |        | NO  | metabo_info.php?molid=53723 |
| 57837 | 327.226572 | [M+Na] <sup>+</sup> | 304.24 | 8 | Mesterolone                                          | C20H32O2 | NA         |        | NO  | metabo_info.php?molid=57837 |
| 62952 | 327.226572 | [M+Na] <sup>+</sup> | 304.24 | 8 | omega-3 Arachidonic Acid                             | C20H32O2 | 24880-40-8 |        | YES | metabo_info.php?molid=62952 |
| 67447 | 327.226572 | [M+Na] <sup>+</sup> | 304.24 | 8 | 2-Ketoepimanool                                      | C20H32O2 | 86561-13-9 | C09124 | NO  | metabo_info.php?molid=67447 |
| 70197 | 327.226572 | [M+Na] <sup>+</sup> | 304.24 | 8 | Metholone                                            | C20H32O2 |            | C14605 | NO  | metabo_info.php?molid=70197 |
| 70455 | 327.226572 | [M+Na] <sup>+</sup> | 304.24 | 8 | οαίρηα-πγυγoxy-ζαίρηα-methyl-5alpha-androstan-17-one | C20H32O2 |            | C14956 | NO  | metabo_info.php?molid=70455 |
| 70666 | 327.226572 | [M+Na] <sup>+</sup> | 304.24 | 8 | 17-Methyl-5alpha-androst-2-ene-1alpha,17beta-diol    | C20H32O2 |            | C15176 | NO  | metabo_info.php?molid=70666 |
| 70729 | 327.226572 | [M+Na] <sup>+</sup> | 304.24 | 8 | 17βeta-πγυγoxy-4αίρηα-methyl-5alpha-androstan-3-one  | C20H32O2 |            | C15252 | NO  | metabo_info.php?molid=70729 |
| 70839 | 327.226572 | [M+Na] <sup>+</sup> | 304.24 | 8 | 3beta-Methoxyandrost-5-en-16beta-ol                  | C20H32O2 |            | C15367 | NO  | metabo_info.php?molid=70839 |

|       |            |                     |        |   |                                                                   |                                                |            |        |    |                             |
|-------|------------|---------------------|--------|---|-------------------------------------------------------------------|------------------------------------------------|------------|--------|----|-----------------------------|
| 71945 | 327.226572 | [M+Na] <sup>+</sup> | 304.24 | 8 | Dihydroabietic acid                                               | C <sub>20</sub> H <sub>32</sub> O <sub>2</sub> | 19407-37-5 | C17920 | NO | metabo_info.php?molid=71945 |
| 73668 | 327.226572 | [M+Na] <sup>+</sup> | 304.24 | 8 | 18-methyl-5Z,8Z,11Z,14Z-nonadecatetraenoic acid                   | C <sub>20</sub> H <sub>32</sub> O <sub>2</sub> |            |        | NO | metabo_info.php?molid=73668 |
| 73777 | 327.226572 | [M+Na] <sup>+</sup> | 304.24 | 8 | 16:3(2E,10E,12E)(3Me,5Me[R],7My,15Me)                             | C <sub>20</sub> H <sub>32</sub> O <sub>2</sub> |            |        | NO | metabo_info.php?molid=73777 |
| 73790 | 327.226572 | [M+Na] <sup>+</sup> | 304.24 | 8 | 17:4(2E,4E,9E,11E)(8Me[R],10Me,15Me[R])                           | C <sub>20</sub> H <sub>32</sub> O <sub>2</sub> |            |        | NO | metabo_info.php?molid=73790 |
| 73864 | 327.226572 | [M+Na] <sup>+</sup> | 304.24 | 8 | 4, 8, 12, 16-icosatetraenoic acid; C <sub>20</sub> :4n-4,8,12,16  | C <sub>20</sub> H <sub>32</sub> O <sub>2</sub> |            |        | NO | metabo_info.php?molid=73864 |
| 73865 | 327.226572 | [M+Na] <sup>+</sup> | 304.24 | 8 | 6, 10, 14, 18-icosatetraenoic acid; C <sub>20</sub> :4n-2,6,10,14 | C <sub>20</sub> H <sub>32</sub> O <sub>2</sub> |            |        | NO | metabo_info.php?molid=73865 |
| 73866 | 327.226572 | [M+Na] <sup>+</sup> | 304.24 | 8 | 8, 11, 14, 17-icosatetraenoic acid; C <sub>20</sub> :4n-3,6,9,12  | C <sub>20</sub> H <sub>32</sub> O <sub>2</sub> |            |        | NO | metabo_info.php?molid=73866 |
| 74056 | 327.226572 | [M+Na] <sup>+</sup> | 304.24 | 8 | 4, 7, 10, 13-Eicosatetraenoic acid                                | C <sub>20</sub> H <sub>32</sub> O <sub>2</sub> |            |        | NO | metabo_info.php?molid=74056 |
| 74057 | 327.226572 | [M+Na] <sup>+</sup> | 304.24 | 8 | 4Z,7Z,10Z,13Z-eicosatetraenoic acid                               | C <sub>20</sub> H <sub>32</sub> O <sub>2</sub> |            |        | NO | metabo_info.php?molid=74057 |
| 74058 | 327.226572 | [M+Na] <sup>+</sup> | 304.24 | 8 | C <sub>20</sub> :4n-6,9,12,16                                     | C <sub>20</sub> H <sub>32</sub> O <sub>2</sub> |            |        | NO | metabo_info.php?molid=74058 |
| 74059 | 327.226572 | [M+Na] <sup>+</sup> | 304.24 | 8 | C <sub>20</sub> :4n-3,6,9,15                                      | C <sub>20</sub> H <sub>32</sub> O <sub>2</sub> |            |        | NO | metabo_info.php?molid=74059 |
| 74060 | 327.226572 | [M+Na] <sup>+</sup> | 304.24 | 8 | C <sub>20</sub> :4n-6,9,12,15                                     | C <sub>20</sub> H <sub>32</sub> O <sub>2</sub> |            |        | NO | metabo_info.php?molid=74060 |
| 74061 | 327.226572 | [M+Na] <sup>+</sup> | 304.24 | 8 | Juniperonic acid                                                  | C <sub>20</sub> H <sub>32</sub> O <sub>2</sub> |            |        | NO | metabo_info.php?molid=74061 |
| 74062 | 327.226572 | [M+Na] <sup>+</sup> | 304.24 | 8 | C <sub>20</sub> :4n-2,6,9,12                                      | C <sub>20</sub> H <sub>32</sub> O <sub>2</sub> |            |        | NO | metabo_info.php?molid=74062 |
| 74288 | 327.226572 | [M+Na] <sup>+</sup> | 304.24 | 8 | 7,13-Eicosadiynoic acid                                           | C <sub>20</sub> H <sub>32</sub> O <sub>2</sub> |            |        | NO | metabo_info.php?molid=74288 |
| 74290 | 327.226572 | [M+Na] <sup>+</sup> | 304.24 | 8 | 10,13-Eicosadiynoic acid                                          | C <sub>20</sub> H <sub>32</sub> O <sub>2</sub> |            |        | NO | metabo_info.php?molid=74290 |
| 74352 | 327.226572 | [M+Na] <sup>+</sup> | 304.24 | 8 | C <sub>20</sub> :4n-6,9,12,18                                     | C <sub>20</sub> H <sub>32</sub> O <sub>2</sub> |            |        | NO | metabo_info.php?molid=74352 |
| 74353 | 327.226572 | [M+Na] <sup>+</sup> | 304.24 | 8 | 5(E)-Arachidonic acid                                             | C <sub>20</sub> H <sub>32</sub> O <sub>2</sub> |            |        | NO | metabo_info.php?molid=74353 |
| 74354 | 327.226572 | [M+Na] <sup>+</sup> | 304.24 | 8 | omega-3-Arachidonic acid                                          | C <sub>20</sub> H <sub>32</sub> O <sub>2</sub> |            |        | NO | metabo_info.php?molid=74354 |
| 74407 | 327.226572 | [M+Na] <sup>+</sup> | 304.24 | 8 | 20:4(5Z,13Z,16Z,19Z)                                              | C <sub>20</sub> H <sub>32</sub> O <sub>2</sub> |            |        | NO | metabo_info.php?molid=74407 |
| 74440 | 327.226572 | [M+Na] <sup>+</sup> | 304.24 | 8 | 17:4(2E,4E,9E,11E)(7Me[R],10Me,13Me[S])                           | C <sub>20</sub> H <sub>32</sub> O <sub>2</sub> |            |        | NO | metabo_info.php?molid=74440 |
| 74441 | 327.226572 | [M+Na] <sup>+</sup> | 304.24 | 8 | 16:3(2E,9E,11E)(3Me,5Me[S],7My,15Me)                              | C <sub>20</sub> H <sub>32</sub> O <sub>2</sub> |            |        | NO | metabo_info.php?molid=74441 |
| 74893 | 327.226572 | [M+Na] <sup>+</sup> | 304.24 | 8 | 10,13-Eicosadiynoic acid                                          | C <sub>20</sub> H <sub>32</sub> O <sub>2</sub> |            |        | NO | metabo_info.php?molid=74893 |

|       |            |                     |         |   |                                      |              |             |            |                             |                             |
|-------|------------|---------------------|---------|---|--------------------------------------|--------------|-------------|------------|-----------------------------|-----------------------------|
| 91734 | 327.226572 | [M+Na] <sup>+</sup> | 304.24  | 8 | Sideridiol                           | C20H32O2     | 19891-25-9  | NO         | metabo_info.php?molid=91734 |                             |
| 91751 | 327.226572 | [M+Na] <sup>+</sup> | 304.24  | 8 | ent-17-Hydroxy-16beta-kauran-19-al   | C20H32O2     | 41756-43-8  | NO         | metabo_info.php?molid=91751 |                             |
| 91781 | 327.226572 | [M+Na] <sup>+</sup> | 304.24  | 8 | Yucalexin P21                        | C20H32O2     | 119626-54-9 | NO         | metabo_info.php?molid=91781 |                             |
| 91842 | 327.226572 | [M+Na] <sup>+</sup> | 304.24  | 8 | Copalic acid                         | C20H32O2     | 20257-75-4  | NO         | metabo_info.php?molid=91842 |                             |
| 91843 | 327.226572 | [M+Na] <sup>+</sup> | 304.24  | 8 | Junicedral                           | C20H32O2     | 70901-87-0  | NO         | metabo_info.php?molid=91843 |                             |
| 92634 | 327.226572 | [M+Na] <sup>+</sup> | 304.24  | 8 | 7,13-Eperudien-15-oic acid           | C20H32O2     | 14022-43-6  | NO         | metabo_info.php?molid=92634 |                             |
| 94242 | 327.226572 | [M+Na] <sup>+</sup> | 304.24  | 8 | Oryzalexin S                         | C20H32O2     | 143437-61-0 | NO         | metabo_info.php?molid=94242 |                             |
| 94257 | 327.226572 | [M+Na] <sup>+</sup> | 304.24  | 8 | Oryzalexin E                         | C20H32O2     | 150943-96-7 | NO         | metabo_info.php?molid=94257 |                             |
| 69492 | 226.949762 | [M+H] <sup>+</sup>  | 225.944 | 4 | 2,5-Dichloro-4-oxohex-2-enedioate    | C6H4Cl2O5    |             | C128<br>35 | NO                          | metabo_info.php?molid=69492 |
| 69492 | 226.950522 | [M+H] <sup>+</sup>  | 225.944 | 1 | 2,5-Dichloro-4-oxohex-2-enedioate    | C6H4Cl2O5    |             | C128<br>35 | NO                          | metabo_info.php?molid=69492 |
| 45078 | 338.33917  | [M+H] <sup>+</sup>  | 337.334 | 7 | N-Cyclohexanecarbonylpentadecylamine | C22H43NO     | 702638-84-4 | YES        | metabo_info.php?molid=45078 |                             |
| 64926 | 338.33917  | [M+H] <sup>+</sup>  | 337.334 | 7 | 13Z-Docosenamide                     | C22H43NO     | 112-84-5    | YES        | metabo_info.php?molid=64926 |                             |
| 85041 | 338.33917  | [M+H] <sup>+</sup>  | 337.334 | 7 | 13E-Docosenamide                     | C22H43NO     |             | YES        | metabo_info.php?molid=85041 |                             |
| 66759 | 273.136098 | [M+H] <sup>+</sup>  | 272.129 | 1 | Procaine hydrochloride               | C13H21ClN2O2 | #####       | C078<br>94 | NO                          | metabo_info.php?molid=66759 |
| 67546 | 273.136098 | [M+H] <sup>+</sup>  | 272.131 | 9 | Sempervirine                         | C19H16N2     | 6882-99-1   | C092<br>40 | NO                          | metabo_info.php?molid=67546 |
| 1271  | 273.136098 | [M+Na] <sup>+</sup> | 250.147 | 0 | Desmethylmianserin                   | C17H18N2     | 71936-92-0  | NO         | metabo_info.php?molid=1271  |                             |
| 1E+05 | 764.604923 | [M+Na] <sup>+</sup> | 741.612 | 5 | GlcCer(d15:1/22:0)                   | C43H83NO8    |             | NO         | metabo_info.php?molid=10320 |                             |



|       |            |                     |         |   |                                      |              |             |        |                             |                             |
|-------|------------|---------------------|---------|---|--------------------------------------|--------------|-------------|--------|-----------------------------|-----------------------------|
| 45078 | 338.339116 | [M+H] <sup>+</sup>  | 337.334 | 7 | N-Cyclohexanecarbonylpentadecylamine | C22H43NO     | 702638-84-4 | YES    | metabo_info.php?molid=45078 |                             |
| 64926 | 338.339116 | [M+H] <sup>+</sup>  | 337.334 | 7 | 13Z-Docosenamide                     | C22H43NO     | 112-84-5    | YES    | metabo_info.php?molid=64926 |                             |
| 85041 | 338.339116 | [M+H] <sup>+</sup>  | 337.334 | 7 | 13E-Docosenamide                     | C22H43NO     |             | YES    | metabo_info.php?molid=85041 |                             |
| 66759 | 273.135559 | [M+H] <sup>+</sup>  | 272.129 | 3 | Procaine hydrochloride               | C13H21ClN2O2 | #####       | C07894 | NO                          | metabo_info.php?molid=66759 |
| 1271  | 273.135559 | [M+Na] <sup>+</sup> | 250.147 | 2 | Desmethylmianserin                   | C17H18N2     | 71936-92-0  | NO     | metabo_info.php?molid=1271  |                             |
| 66759 | 273.13603  | [M+H] <sup>+</sup>  | 272.129 | 1 | Procaine hydrochloride               | C13H21ClN2O2 | #####       | C07894 | NO                          | metabo_info.php?molid=66759 |
| 67546 | 273.13603  | [M+H] <sup>+</sup>  | 272.131 | 9 | Sempervirine                         | C19H16N2     | 6882-99-1   | C09240 | NO                          | metabo_info.php?molid=67546 |
| 1271  | 273.13603  | [M+Na] <sup>+</sup> | 250.147 | 0 | Desmethylmianserin                   | C17H18N2     | 71936-92-0  | NO     | metabo_info.php?molid=1271  |                             |
| 133   | 203.050742 | [M+Na] <sup>+</sup> | 180.063 | 9 | &alpha;-D-Glucose                    | C6H12O6      | 492-62-6    | C00267 | YES                         | metabo_info.php?molid=133   |
| 134   | 203.050742 | [M+Na] <sup>+</sup> | 180.063 | 9 | D-Galactose                          | C6H12O6      | 59-23-4     | C00124 | YES                         | metabo_info.php?molid=134   |
| 135   | 203.050742 | [M+Na] <sup>+</sup> | 180.063 | 9 | D-Fructose                           | C6H12O6      | 57-48-7     | C00095 | YES                         | metabo_info.php?molid=135   |
| 136   | 203.050742 | [M+Na] <sup>+</sup> | 180.063 | 9 | D-(+)-Mannose                        | C6H12O6      | 3458-28-4   | C00159 | YES                         | metabo_info.php?molid=136   |
| 144   | 203.050742 | [M+Na] <sup>+</sup> | 180.063 | 9 | myo-Inositol                         | C6H12O6      | #####       | C00137 | YES                         | metabo_info.php?molid=144   |
| 348   | 203.050742 | [M+Na] <sup>+</sup> | 180.063 | 9 | Allose                               | C6H12O6      | 6038-51-3   | C01582 | YES                         | metabo_info.php?molid=348   |
| 3754  | 203.050742 | [M+Na] <sup>+</sup> | 180.063 | 9 | b-D-Galactopyranose                  | C6H12O6      | 7296-64-2   | C17207 | YES                         | metabo_info.php?molid=3754  |
| 3755  | 203.050742 | [M+Na] <sup>+</sup> | 180.063 | 9 | b-Glucose                            | C6H12O6      | 492-61-5    | C00221 | NO                          | metabo_info.php?molid=3755  |
| 4184  | 203.050742 | [M+Na] <sup>+</sup> | 180.063 | 9 | L-Galactose                          | C6H12O6      | 15572-79-9  | C01825 | NO                          | metabo_info.php?molid=4184  |

|       |            |                     |         |   |                              |              |            |        |     |                             |
|-------|------------|---------------------|---------|---|------------------------------|--------------|------------|--------|-----|-----------------------------|
| 44877 | 203.050742 | [M+Na] <sup>+</sup> | 180.063 | 9 | allo-Inositol                | C6H12O6      | 643-10-7   | C00137 | NO  | metabo_info.php?molid=44877 |
| 58151 | 203.050742 | [M+Na] <sup>+</sup> | 180.063 | 9 | D-Tagatose                   | C6H12O6      | 87-81-0    | C00795 | YES | metabo_info.php?molid=58151 |
| 63118 | 203.050742 | [M+Na] <sup>+</sup> | 180.063 | 9 | &alpha;-D-Glucose            | C6H12O6      | 492-62-6   | C00267 | NO  | metabo_info.php?molid=63118 |
| 63163 | 203.050742 | [M+Na] <sup>+</sup> | 180.063 | 9 | L-Rhamnonate                 | C6H12O6      | 6422-34-0  | C01934 | NO  | metabo_info.php?molid=63163 |
| 63168 | 203.050742 | [M+Na] <sup>+</sup> | 180.063 | 9 | D-Fuconate                   | C6H12O6      |            | C01680 | NO  | metabo_info.php?molid=63168 |
| 63197 | 203.050742 | [M+Na] <sup>+</sup> | 180.063 | 9 | &beta;-D-Fructose            | C6H12O6      | 53188-23-1 | C02336 | NO  | metabo_info.php?molid=63197 |
| 64618 | 203.050742 | [M+Na] <sup>+</sup> | 180.063 | 9 | L-(+)-Gulose                 | C6H12O6      | 6027-89-0  | C15923 | YES | metabo_info.php?molid=64618 |
| 65598 | 203.050742 | [M+Na] <sup>+</sup> | 180.063 | 9 | Sorbose                      | C6H12O6      | 3615-39-2  | C01452 | NO  | metabo_info.php?molid=65598 |
| 65675 | 203.050742 | [M+Na] <sup>+</sup> | 180.063 | 9 | D-Hamamelose                 | C6H12O6      | 4573-78-8  | C01906 | NO  | metabo_info.php?molid=65675 |
| 65829 | 203.050742 | [M+Na] <sup>+</sup> | 180.063 | 9 | 2-Deoxy-D-gluconate          | C6H12O6      |            | C02782 | NO  | metabo_info.php?molid=65829 |
| 66926 | 203.050742 | [M+Na] <sup>+</sup> | 180.063 | 9 | beta-D-Hamamelopyranose      | C6H12O6      |            | C08351 | NO  | metabo_info.php?molid=66926 |
| 68675 | 203.050742 | [M+Na] <sup>+</sup> | 180.063 | 9 | D-Fructose                   | C6H12O6      | 57-48-7    | C10906 | YES | metabo_info.php?molid=68675 |
| 4131  | 203.050742 | [M+Na] <sup>+</sup> | 180.063 | 9 | 1,3-Dihydroxyacetone         | C6H12O6      | 62147-49-3 |        | NO  | metabo_info.php?molid=4131  |
| 5335  | 203.050742 | [M+Na] <sup>+</sup> | 180.063 | 9 | 3-Deoxyarabinohehexonic acid | C6H12O6      |            |        | NO  | metabo_info.php?molid=5335  |
| 66759 | 273.136079 | [M+H] <sup>+</sup>  | 272.129 | 1 | Procaine hydrochloride       | C13H21ClN2O2 | #####      | C07894 | NO  | metabo_info.php?molid=66759 |
| 67546 | 273.136079 | [M+H] <sup>+</sup>  | 272.131 | 9 | Sempervirine                 | C19H16N2     | 6882-99-1  | C09240 | NO  | metabo_info.php?molid=67546 |
| 1271  | 273.136079 | [M+Na] <sup>+</sup> | 250.147 | 0 | Desmethylnianserin           | C17H18N2     | 71936-92-0 |        | NO  | metabo_info.php?molid=1271  |

|       |            |                     |         |   |                                                            |                                                                              |            |        |     |                             |
|-------|------------|---------------------|---------|---|------------------------------------------------------------|------------------------------------------------------------------------------|------------|--------|-----|-----------------------------|
| 1802  | 426.13567  | [M+Na] <sup>+</sup> | 403.149 | 4 | Perphenazine                                               | C <sub>21</sub> H <sub>26</sub> ClN <sub>3</sub> OS                          | 58-39-9    | C07427 | YES | metabo_info.php?molid=1802  |
| 36396 | 425.131742 | [M+H] <sup>+</sup>  | 424.125 | 0 | bromovulone I                                              | C <sub>21</sub> H <sub>29</sub> BrO <sub>4</sub>                             |            |        | NO  | metabo_info.php?molid=36396 |
| 65111 | 425.131742 | [M+H] <sup>+</sup>  | 424.127 | 6 | Nap-Thr-OH                                                 | C <sub>22</sub> H <sub>20</sub> N <sub>2</sub> O <sub>7</sub>                |            |        | YES | metabo_info.php?molid=65111 |
| 65323 | 425.131742 | [M+H] <sup>+</sup>  | 424.127 | 6 | Ser-Nap-OH                                                 | C <sub>22</sub> H <sub>20</sub> N <sub>2</sub> O <sub>7</sub>                |            |        | YES | metabo_info.php?molid=65323 |
| 67357 | 425.131742 | [M+H] <sup>+</sup>  | 424.127 | 6 | Adifoline                                                  | C <sub>22</sub> H <sub>20</sub> N <sub>2</sub> O <sub>7</sub>                | 20072-28-0 | C09020 | NO  | metabo_info.php?molid=67357 |
| 65082 | 425.131742 | [M+Na] <sup>+</sup> | 402.143 | 0 | Val-TyrMe-OH                                               | C <sub>20</sub> H <sub>22</sub> N <sub>2</sub> O <sub>7</sub>                |            |        | YES | metabo_info.php?molid=65082 |
| 65124 | 425.131742 | [M+Na] <sup>+</sup> | 402.143 | 0 | Tyr-Val-OH                                                 | C <sub>20</sub> H <sub>22</sub> N <sub>2</sub> O <sub>7</sub>                |            |        | YES | metabo_info.php?molid=65124 |
| 65171 | 425.131742 | [M+Na] <sup>+</sup> | 402.143 | 0 | Leu-Tyr-OH                                                 | C <sub>20</sub> H <sub>22</sub> N <sub>2</sub> O <sub>7</sub>                |            |        | YES | metabo_info.php?molid=65171 |
| 65179 | 425.131742 | [M+Na] <sup>+</sup> | 402.143 | 0 | Ile-Tyr-OH                                                 | C <sub>20</sub> H <sub>22</sub> N <sub>2</sub> O <sub>7</sub>                |            |        | YES | metabo_info.php?molid=65179 |
| 65300 | 425.131742 | [M+Na] <sup>+</sup> | 402.143 | 0 | TyrMe-Abu-OH                                               | C <sub>20</sub> H <sub>22</sub> N <sub>2</sub> O <sub>7</sub>                |            |        | YES | metabo_info.php?molid=65300 |
| 65348 | 425.131742 | [M+Na] <sup>+</sup> | 402.143 | 0 | Thr-HoPhe-OH                                               | C <sub>20</sub> H <sub>22</sub> N <sub>2</sub> O <sub>7</sub>                |            |        | YES | metabo_info.php?molid=65348 |
| 1544  | 425.131742 | [M+Na] <sup>+</sup> | 402.143 | 0 | desmethyldehydronimodipine                                 | C <sub>20</sub> H <sub>22</sub> N <sub>2</sub> O <sub>7</sub>                | 82219-48-5 |        | NO  | metabo_info.php?molid=1544  |
| 2837  | 425.131742 | [M+Na] <sup>+</sup> | 402.144 | 2 | Thioridazine 5-sulfone                                     | C <sub>21</sub> H <sub>26</sub> N <sub>2</sub> O <sub>2</sub> S <sub>2</sub> | 7651-42-5  |        | NO  | metabo_info.php?molid=2837  |
| 2838  | 425.131742 | [M+Na] <sup>+</sup> | 402.144 | 2 | Thioridazine-2-sulfone                                     | C <sub>21</sub> H <sub>26</sub> N <sub>2</sub> O <sub>2</sub> S <sub>2</sub> | 14759-06-9 |        | NO  | metabo_info.php?molid=2838  |
| 2841  | 425.131742 | [M+Na] <sup>+</sup> | 402.144 | 2 | Thioridazine 2,5-disulfoxide                               | C <sub>21</sub> H <sub>26</sub> N <sub>2</sub> O <sub>2</sub> S <sub>2</sub> | 53926-89-9 |        | NO  | metabo_info.php?molid=2841  |
| 47723 | 425.131742 | [M+Na] <sup>+</sup> | 402.147 | 9 | Ulexone B                                                  | C <sub>25</sub> H <sub>22</sub> O <sub>5</sub>                               |            |        | NO  | metabo_info.php?molid=47723 |
| 48384 | 425.131742 | [M+Na] <sup>+</sup> | 402.147 | 9 | cis-and-trans-Inophyllolide                                | C <sub>25</sub> H <sub>22</sub> O <sub>5</sub>                               |            |        | NO  | metabo_info.php?molid=48384 |
| 48387 | 425.131742 | [M+Na] <sup>+</sup> | 402.147 | 9 | Tomentolide A                                              | C <sub>25</sub> H <sub>22</sub> O <sub>5</sub>                               |            |        | NO  | metabo_info.php?molid=48387 |
| 48869 | 777.227879 | [M+Na] <sup>+</sup> | 754.232 | 8 | 2''''-O-Rhamnosyl-2''''-O-glucosylcytoside                 | C <sub>34</sub> H <sub>42</sub> O <sub>19</sub>                              |            |        | NO  | metabo_info.php?molid=48869 |
| 86898 | 777.227879 | [M+Na] <sup>+</sup> | 754.232 | 8 | 1,2-Disinapoylgentiobiose                                  | C <sub>34</sub> H <sub>42</sub> O <sub>19</sub>                              |            |        | NO  | metabo_info.php?molid=86898 |
| 48891 | 777.227879 | [M+Na] <sup>+</sup> | 754.232 | 8 | Acacetin 7-O-[2''''-O-rhamnosyl-2''''-O-glucosyl]glucoside | C <sub>34</sub> H <sub>42</sub> O <sub>19</sub>                              |            |        | NO  | metabo_info.php?molid=48891 |
| 48989 | 777.227879 | [M+Na] <sup>+</sup> | 754.232 | 8 | 3-(4Rhamnosyl)-Luteolin-7-O-glucoside                      | C <sub>34</sub> H <sub>42</sub> O <sub>19</sub>                              |            |        | NO  | metabo_info.php?molid=48989 |
| 49247 | 777.227879 | [M+Na] <sup>+</sup> | 754.232 | 8 | (4G-rhamnosyl)neochesperidide                              | C <sub>34</sub> H <sub>42</sub> O <sub>19</sub>                              |            |        | NO  | metabo_info.php?molid=49247 |

|       |            |                     |         |   |                                                               |              |             |            |                             |                             |
|-------|------------|---------------------|---------|---|---------------------------------------------------------------|--------------|-------------|------------|-----------------------------|-----------------------------|
| 49250 | 777.227879 | [M+Na] <sup>+</sup> | 754.232 | 8 | Diosmetin 7-(2',6'-dirhamnosyl)-glucoside                     | C34H42O19    |             | NO         | metabo_info.php?molid=49250 |                             |
| 49437 | 777.227879 | [M+Na] <sup>+</sup> | 754.232 | 8 | Swertisin 4'-O-glucoside-2'-O-rhamnoside                      | C34H42O19    |             | NO         | metabo_info.php?molid=49437 |                             |
| 50992 | 777.227879 | [M+Na] <sup>+</sup> | 754.232 | 8 | Rhamnocitrin 3-isorhamninoside                                | C34H42O19    |             | NO         | metabo_info.php?molid=50992 |                             |
| 50993 | 777.227879 | [M+Na] <sup>+</sup> | 754.232 | 8 | Rhamnocitrin 3-isorhamninoside                                | C34H42O19    |             | NO         | metabo_info.php?molid=50993 |                             |
| 93769 | 777.227879 | [M+Na] <sup>+</sup> | 754.232 | 8 | Raphanusol A                                                  | C34H42O19    | 74565-72-3  | NO         | metabo_info.php?molid=93769 |                             |
| 95268 | 777.227879 | [M+Na] <sup>+</sup> | 754.232 | 8 | Kaempferide 3-[rhamnopyranosyl-(1->6)-glucoside] 7-rhamnoside | C34H42O19    | 150164-07-1 | NO         | metabo_info.php?molid=95268 |                             |
| 95297 | 777.227879 | [M+Na] <sup>+</sup> | 754.232 | 8 | 3,6-Disinapoilsucrose                                         | C34H42O19    | 139891-98-8 | NO         | metabo_info.php?molid=95297 |                             |
| 1270  | 287.151814 | [M+Na] <sup>+</sup> | 264.163 | 0 | Mianserin                                                     | C18H20N2     | 24219-97-4  | YES        | metabo_info.php?molid=1270  |                             |
| 67371 | 287.151814 | [M+Na] <sup>+</sup> | 264.163 | 0 | (-)-Apparicine                                                | C18H20N2     | 2122-36-3   | C090<br>36 | NO                          | metabo_info.php?molid=67371 |
| 66759 | 273.136431 | [M+H] <sup>+</sup>  | 272.129 | 0 | Procaine hydrochloride                                        | C13H21ClN2O2 | #####       | C078<br>94 | NO                          | metabo_info.php?molid=66759 |
| 67546 | 273.136431 | [M+H] <sup>+</sup>  | 272.131 | 8 | Sempervirine                                                  | C19H16N2     | 6882-99-1   | C092<br>40 | NO                          | metabo_info.php?molid=67546 |
| 1271  | 273.136431 | [M+Na] <sup>+</sup> | 250.147 | 0 | Desmethylmianserin                                            | C17H18N2     | 71936-92-0  | NO         | metabo_info.php?molid=1271  |                             |
| 73548 | 410.161775 | [M+H] <sup>+</sup>  | 409.153 | 4 | Acetylcorynoline                                              | C23H23NO6    | 18797-80-3  | YES        | metabo_info.php?molid=73548 |                             |
| 66912 | 410.161775 | [M+H] <sup>+</sup>  | 409.158 | 9 | Linustatin                                                    | C16H27NO11   | 72229-40-4  | C083<br>33 | YES                         | metabo_info.php?molid=66912 |
| 69508 | 410.161775 | [M+Na] <sup>+</sup> | 387.171 | 2 | Nemonapride                                                   | C21H26ClN3O2 | 75272-39-8  | C129<br>15 | NO                          | metabo_info.php?molid=69508 |
| 85713 | 284.137711 | [M+H] <sup>+</sup>  | 283.128 | 8 | Glutaminyl-Histidine                                          | C11H17N5O4   |             | NO         | metabo_info.php?molid=85713 |                             |
| 85789 | 284.137711 | [M+H] <sup>+</sup>  | 283.128 | 8 | Histidinyl-Glutamine                                          | C11H17N5O4   |             | NO         | metabo_info.php?molid=85789 |                             |
| 85805 | 284.137711 | [M+H] <sup>+</sup>  | 283.128 | 8 | Histidinyl-Gamma-glutamate                                    | C11H17N5O4   |             | NO         | metabo_info.php?molid=85805 |                             |
| 86043 | 284.137711 | [M+H] <sup>+</sup>  | 283.128 | 8 | Gamma-glutamyl-Histidine                                      | C11H17N5O4   |             | NO         | metabo_info.php?molid=86043 |                             |
